1 **Efficiency of genomic prediction of non-assessed single crosses**

2 José Marcelo Soriano Viana,<sup>\*1</sup> Helcio Duarte Pereira,<sup>1</sup> Gabriel Borges Mundim,<sup>†</sup> Hans-Peter  
3 Piepho,<sup>‡</sup> and Fabyano Fonseca e Silva<sup>§</sup>

4 <sup>\*</sup>Federal University of Viçosa, Department of General Biology, 36570-900, Viçosa, MG, Brazil.

5 <sup>†</sup>Dow AgroSciences Seeds and Biotechnology Brazil Ltda, 38490-000, Indianópolis, MG, Brazil.

6 <sup>‡</sup>University of Hohenheim, Institute of Crop Science, Biostatistics Unit, 70599, Stuttgart, Germany.

7 <sup>§</sup>Federal University of Viçosa, Department of Animal Science, 36570-900, Viçosa, MG, Brazil.

8 Reference number for data available in public repository:

9 <https://doi.org/10.6084/m9.figshare.5035130.v3>

10 *REALbreeding* private link: <https://figshare.com/s/618bee7accd410464232>.

11 Running title: Genomic prediction of single crosses.

12 **KEYWORDS** genomic selection; linkage disequilibrium; general combining ability; specific  
13 combining ability; doubled haploids.

14 <sup>1</sup>Corresponding author: José Marcelo Soriano Viana. Federal University of Viçosa, Department of  
15 General Biology, 36570-900, Viçosa, MG, Brazil. E-mail: [jmsviana@ufv.br](mailto:jmsviana@ufv.br). Telephone:  
16 +55(31)3899-2514.

17 **ABSTRACT** An important application of genomic selection in plant breeding is the prediction of  
18 untested single crosses (SCs). Most investigations on the prediction efficiency were based on tested  
19 SCs, using cross-validation. The main objective was to assess the prediction efficiency by  
20 correlating the predicted and true genotypic values of untested SCs (accuracy) and measuring the  
21 efficacy of identification of the best 300 untested SCs (coincidence), using simulated data. We  
22 assumed 10,000 SNPs, 400 QTLs, two groups of 70 selected DH lines, and 4,900 SCs. The  
23 heritabilities for the assessed SCs were 30, 60 and 100%. The scenarios included three sampling  
24 processes of DH lines, two sampling processes of SCs for testing, two SNP densities, DH lines from  
25 distinct and same populations, DH lines from populations with lower LD, two genetic models, three  
26 statistical models, and three statistical approaches. We derived a model for genomic prediction  
27 based on SNP average effects of substitution and dominance deviations. The prediction accuracy is  
28 not affected by the linkage phase. The prediction of untested SCs is very efficient. The accuracies  
29 and coincidences ranged from approximately 0.8 and 0.5, respectively, under low heritability, to 0.9  
30 and 0.7, assuming high heritability. Additionally, we highlighted the relevance of the overall LD  
31 and evidenced that efficient prediction of untested SCs can be achieved for crops that show no  
32 heterotic pattern, for reduced training set size (10%), for SNP density of 1 cM, and for distinct  
33 sampling processes of DH lines, based on random choice of the SCs for testing.

34

## INTRODUCTION

35 Genomic selection is very commonly used in animal breeding programs, especially for dairy  
36 cattle (Van Eenennaam et al. 2014). The same cannot yet be said to the same degree concerning  
37 crop breeding. The main reasons for the effective application of genomic selection in livestock  
38 breeding are: it is efficient, that is, the process has high prediction accuracy, the cost of phenotyping  
39 (mainly progeny test) is higher than the cost of genotyping, and the process significantly shortens  
40 the selection cycle (Meuwissen et al. 2013). In spite of the many field- and simulation-based studies  
41 with genomic selection in plant breeding, in general the cost of phenotyping is often still much  
42 lower than the cost of genotyping, restricting its application in breeding programs. Jonas and de  
43 Koning (2013) consider that genomic selection has the potential to improve existing plant breeding  
44 schemes. However, based also on the high diversity and complexity of plant breeding methods, they  
45 stated that there are great obstacles to overcome.

46 An important application of genomic selection in plant breeding is the prediction of untested  
47 single crosses (genotypic value prediction) and testcrosses (general combining ability effect  
48 prediction) in hybrid breeding (Zhao et al. 2015). Genomic prediction of two- and three-way crosses  
49 has been investigated (Philipp et al. 2016). The prediction of untested single crosses was pioneered  
50 by Bernardo (1994), based on best linear unbiased prediction (BLUP). Many significant studies on  
51 prediction of untested single cross and testcross performance have been published in the last 23  
52 years, focused on the assessment of the prediction accuracy. Most investigations were based on  
53 empirical data and estimated the prediction accuracy using a cross-validation procedure. Very few  
54 were based on simulated data (Li et al. 2017; Technow et al. 2012). With no exception, the  
55 inference was that prediction of untested single crosses and testcrosses can be an efficient,  
56 depending on heritability, training set size, and number of tested inbreds in hybrid combination  
57 (both, one, and none parents tested). Remarkably, this conclusion was drawn from studies differing  
58 in the type of molecular marker, density of markers, number of inbreds, level of relatedness,  
59 diversity, and linkage disequilibrium (LD) between inbreds, heterotic pattern, training set size,

60 genetic model, and statistical approach (Zhao et al. 2015). Efficient prediction of barley two- and  
61 three-way crosses has been achieved when training and validation sets include the same class of  
62 hybrids (Philipp et al. 2016).

63 Most studies on genomic prediction of maize single cross performance published since 2011  
64 have employed single nucleotide polymorphisms (SNP), with the number SNPs filtered ranging  
65 from 425 (Zhao et al. 2013a) to 39,627 (Technow et al. 2012). Based on the physical length of the  
66 maize genome (approximately 2,106 megabase pairs (Mb) according to Maize genetics and  
67 genomics database), the SNP density ranged from approximately 5 to 0.05 Mb, respectively. For  
68 grain yield, the relative prediction accuracies (computed as accuracy/root square of the heritability)  
69 in the two previously cited papers ranged from 0.27 to 0.62 and from 0.65 to 0.95, respectively. The  
70 number of inbreds in each heterotic group was highly variable too, ranging from six and nine  
71 (Bernardo 1994) to 75 and 75 (Technow et al. 2012). The relative accuracy observed by Bernardo  
72 (1994) ranged between 0.72 and 0.89. The number of testcrosses ranged between 255 (Windhausen  
73 et al. 2012) and 1,894 (Albrecht et al. 2014). The relative accuracies ranged from 0.46 to 0.52 and  
74 from 0.33 to 0.65, respectively. The level of relatedness ranged from non-related inbreds in each  
75 group (Technow et al. 2012) to a maximum average value of 0.58 (Bernardo 1995). The relative  
76 accuracy obtained by Bernardo (1995) ranged from 0.41 to 0.80. The common heterotic groups  
77 were Stiff Stalk and non-Stiff Stalk (Kadam et al. 1916) or Dent and Flint (Technow et al. 2014).  
78 The study of Bernardo (1996a) involved nine heterotic groups and the (statistically significant from  
79 zero) relative accuracies ranged from 0.43 to 0.88. No study provided clearly greater prediction  
80 accuracy of the additive-dominance model relative to the additive model. Finally, only with  
81 testcrosses the genomic BLUP (GBLUP) approach outperformed pedigree-based BLUP (Albrecht  
82 et al. 2014; Albrecht et al. 2011) concerning prediction accuracy.

83 Genomic prediction of single crosses has been made based on tested single crosses, using  
84 cross-validation. Thus, the estimated prediction accuracies are not for untested single crosses.

85 Consequently, none of the previous studies on efficiency of genomic prediction of single cross  
86 performance measured the efficacy of identification of the best untested single crosses. Our main  
87 objective was to assess the efficiency of prediction of untested single crosses by correlating the  
88 predicted and true genotypic values of untested single crosses (prediction accuracy) and measuring  
89 the efficacy of identification of the best 300 untested single crosses (coincidence index), using a  
90 large simulated data set. The secondary objectives were to highlight that the prediction accuracy  
91 depends primarily on the overall LD in the groups of selected doubled haploid (DH) lines, that the  
92 prediction efficiency when there is no heterotic pattern can be as high as the prediction efficiency  
93 when there are heterotic groups, and that the choice of single crosses for testing should be random,  
94 instead of selecting DH lines for a diallel, to maximize the prediction efficiency. Further, we  
95 derived a model for genomic prediction of untested single crosses based on the SNP average effects  
96 of substitution and dominance deviations.

## 97 MATERIALS AND METHODS

### 98 Theory

99 Generally, most papers on genomic selection presents only statistical aspects and the genetic  
100 models are deduced from gene to SNP effects. Importantly, when there is some quantitative  
101 genetics theory, the LD between QTLs and SNPs is usually completely ignored. The quantitative  
102 genetics theory developed in this paper provides a genetic model for genomic prediction of untested  
103 single crosses that accounts for the LD between QTLs and SNPs. The model developed offers the  
104 genetic background to the models fitted in important previously papers on prediction of untested  
105 single crosses and testcrosses (Massman et al. 2013; Technow et al. 2012; Albrecht et al. 2011).

### 106 *LD in a group of selected DH or inbred lines*

107 Consider a group of DH or inbred lines selected from a population or heterotic group. Assume  
108 also a QTL (alleles B/b) and a SNP (alleles C/c) where B and b are the alleles that increase and  
109 decrease the trait expression, respectively. Define the joint genotype probabilities as

110  $P(BBCC) = f_{22}$ ,  $P(BBcc) = f_{20}$ ,  $P(bbCC) = f_{02}$ , and  $P(bbcc) = f_{00}$ , where the subscript  
 111 indicates the number of copies of the major allele (B and C). The measure of LD between the QTL  
 112 and the SNP is  $\Delta_{bc} = f_{22}f_{00} - f_{20}f_{02}$  (Kempthorne 1954) and the haplotype frequencies are  
 113  $P(BC) = f_{22} = p_b p_c + \Delta_{bc}$ ,  $P(Bc) = f_{20} = p_b q_c - \Delta_{bc}$ ,  $P(bC) = f_{02} = q_b p_c - \Delta_{bc}$ , and  
 114  $P(bc) = f_{00} = q_b q_c + \Delta_{bc}$ , where  $p$  is the frequency of the major allele (B or C) and  $q = 1 - p$  is  
 115 the frequency of the minor allele (b or c). Notice that  $p_b = f_{22} + f_{20}$  and  $p_c = f_{22} + f_{02}$ . It is  
 116 important to highlight the fact that we are not assuming that the QTL and the SNP are linked and in  
 117 LD in the population or heterotic group, because this is not a necessary condition for genomic  
 118 prediction. But we are assuming that they are in LD in the group of DH or inbred lines.  
 119 Furthermore, because of selection, genetic drift, and inbreeding (only for inbreds and linked QTLs  
 120 and SNPs), the gene and genotypic frequencies and the LD values concerning the selected DH or  
 121 inbred lines cannot be traced to the values in the population or heterotic group.

### 122 ***SNP genotypic values of DH or inbred lines***

123 The average genotypic value for a group of selected DH or inbred lines is  
 124  $M_{IL} = m_b + (p_b - q_b)a_b$ , where  $m_b$  is the mean of the genotypic values of the homozygotes and  
 125  $a_b$  is the deviation between the genotypic value of the homozygote of higher expression and  $m_b$ .  
 126 Thus, the average SNP genotypic values for the DH or inbred lines CC and cc are

$$127 \quad G_{CC} = \frac{1}{f_{.2}} \left[ f_{22}(m_b + a_b) + f_{02}(m_b - a_b) \right] = M_{IL} + 2q_c \alpha_{SNP} = M_{IL} + A_{CC}$$

$$128 \quad G_{cc} = \frac{1}{f_{.0}} \left[ f_{20}(m_b + a_b) + f_{00}(m_b - a_b) \right] = M_{IL} - 2p_c \alpha_{SNP} = M_{IL} + A_{cc}$$

129 where  $\alpha_{\text{SNP}} = \left[ \frac{\Delta_{bc}}{p_c q_c} \right] a_b = \kappa_{bc} a_b$  is the average effect of a SNP substitution in the group of DH

130 or inbred lines and A is the SNP additive value for a DH or inbred line. Notice that  $E(A) = 0$ .

131 Assuming two QTLs (alleles B and b, and E and e) in LD with the SNP, the average effect of  
 132 a SNP substitution in the selected DH or inbred lines is  $\alpha_{\text{SNP}} = \kappa_{bc} a_b + \kappa_{ce} a_e$ , where

133  $\kappa_{ce} = \left[ \frac{\Delta_{ce}}{p_c q_c} \right]$ . Thus, in general, the average effect of a SNP substitution (and the SNP additive

134 value) is proportional to the LD measure and to the a deviation for each QTL that is in LD with the  
 135 marker.

### 136 *SNP genotypic values of single crosses*

137 Aiming to maximize the heterosis, maize breeders commonly assess single crosses originating  
 138 from selected DH or inbred lines from distinct heterotic groups. Consider  $n_1$  DH or inbred lines  
 139 from a population or heterotic group and  $n_2$  DH or inbred lines from a distinct population or  
 140 heterotic group. The average genotypic value for the single crosses derived by crossing the DH or  
 141 inbred lines from group 1 with the DH or inbred lines from group 2 is

$$142 \quad M_H = m_b + \left( p_{b1} p_{b2} - q_{b1} q_{b2} \right) a_b + \left( p_{b1} q_{b2} + q_{b1} p_{b2} \right) d_b$$

143 where  $d_b$  is the dominance deviation (the deviation between the genotypic value of the  
 144 heterozygote and  $m_b$ ).

145 The average genotypic values for the single crosses derived from DH or inbred lines CC and  
 146 cc of the group 1 are

$$147 \quad M_{CC1} = M_H + q_{c1} \kappa_{bc1} \left[ a_b + \left( q_{b2} - p_{b2} \right) d_b \right] = M_H + q_{c1} \kappa_{bc1} \alpha_{b2} = M_H + q_{c1} \alpha_{\text{SNP}1}$$

$$= M_H + GCA_{CC1}$$

$$148 \quad M_{cc1} = M_H - p_{c1}\kappa_{bc1}\alpha_{b2} = M_H - p_{c1}\alpha_{SNP1} = M_H + GCA_{cc1}$$

149 where  $\alpha_{b2}$  is the average effect of allelic substitution in the population derived by random crosses

150 between the DH or inbred lines of group 2,  $\alpha_{SNP1}$  is the SNP effect of allelic substitution in the

151 hybrid population relative to a SNP derived from group 1, and GCA stands for the general

152 combining ability effect for a SNP locus. Notice that  $\alpha_{SNP1}$  depends on the LD in group 1

153 ( $\kappa_{bc1} = \Delta_{bc1}/p_{c1}q_{c1}$ ) and the average effect of allelic substitution in the population derived by

154 random crosses between the DH or inbred lines of group 2. Further,

155  $E(GCA) = p_{c1}GCA_{CC1} + q_{c1}GCA_{cc1} = 0$ . Concerning the single crosses derived from DH or

156 inbred lines CC and cc of the group 2 we have

$$157 \quad M_{CC2} = M_H + q_{c2}\kappa_{bc2}\left[a_b + (q_{b1} - p_{b1})d_b\right] = M_H + q_{c2}\kappa_{bc2}\alpha_{b1} = M_H + q_{c2}\alpha_{SNP2}$$

$$= M_H + GCA_{CC2}$$

$$158 \quad M_{cc2} = M_H - p_{c2}\kappa_{bc2}\alpha_{b1} = M_H - p_{c2}\alpha_{SNP2} = M_H + GCA_{cc2}$$

159 Notice that  $E(GCA) = 0$  also. The average genotypic values for the single crosses concerning

160 the SNP locus are

$$161 \quad M_{CC1 \times CC2} = M_H + q_{c1}\alpha_{SNP1} + q_{c2}\alpha_{SNP2} - 2q_{c1}q_{c2}\kappa_{bc1}\kappa_{bc2}d_b$$

$$= M_H + GCA_{CC1} + GCA_{CC2} + SCA_{CC1 \times CC2}$$

$$162 \quad M_{cc1 \times cc2} = M_H - p_{c1}\alpha_{SNP1} - p_{c2}\alpha_{SNP2} - 2p_{c1}p_{c2}\kappa_{bc1}\kappa_{bc2}d_b$$

$$= M_H + GCA_{cc1} + GCA_{cc2} + SCA_{cc1 \times cc2}$$

$$163 \quad M_{CC1 \times cc2} = M_H + q_{c1}\alpha_{SNP1} - p_{c2}\alpha_{SNP2} + 2q_{c1}p_{c2}\kappa_{bc1}\kappa_{bc2}d_b$$

$$= M_H + GCA_{CC1} + GCA_{cc2} + SCA_{CC1 \times cc2}$$



$$\begin{aligned}
 M_{cc1 \times CC2} &= M_H - p_{c1} \alpha_{SNP1} + q_{c2} \alpha_{SNP2} + 2p_{c1}q_{c2} \kappa_{bc1} \kappa_{bc2} d_b \\
 &= M_H + GCA_{cc1} + GCA_{CC2} + SCA_{cc1 \times CC2}
 \end{aligned}$$

where  $\kappa_{bc1} \kappa_{bc2} d_b = d_{SNP}$  is the SNP dominance deviation in the hybrid population and SCA stands for the specific combining ability effect for a SNP locus. Notice that  $E(SCA) = p_{c1}p_{c2} SCA_{CC1 \times CC2} + p_{c1}q_{c2} SCA_{CC1 \times cc2} + q_{c1}p_{c2} SCA_{cc1 \times CC2} + q_{c1}q_{c2} SCA_{cc1 \times cc2} = 0$  and, for each group,  $E(SCA|CC) = E(SCA|cc) = 0$ . That is, the expectation of the SNP SCA effects given a SNP genotype for the common DH or inbred line is also zero. Notice also that the four genotypic values depends on four unknown parameters ( $M_H$ ,  $\alpha_{SNP1}$ ,  $\alpha_{SNP2}$ , and  $d_{SNP}$ ).

Assuming two QTLs (alleles B and b, and E and e) in LD with the SNP, the SNP dominance deviation is  $d_{SNP} = \kappa_{bc1} \kappa_{bc2} d_b + \kappa_{ce1} \kappa_{ce2} d_e$ . Thus, generally, the SNP dominance deviation (and the SNP SCA effect) is proportional to the product of the LD values in both groups of DH or inbred lines and to the dominance deviation for each QTL that is in LD with the marker.

The previous model expressed as a function of the SNP GCA and SCA effects was proposed by Massman et al. (2013), but these authors assumed  $GCA_{CC} + GCA_{cc} = 0$  (for each heterotic group and for each SNP) and  $SCA_{CC1 \times CC2} = SCA_{cc1 \times cc2} = -SCA_{CC1 \times cc2} = -SCA_{cc1 \times CC2}$ . Technow et al. (2012) have used a standard extension from QTL to SNP, defining the single cross genotypic value for a SNP as a function of the SNP a and d deviations. That is,  $M = M_H + u_1 a_1 + u_2 a_2 + u_3 d$ , where  $u_1$  and  $u_2$  equal to 1/2 or -1/2 if the corresponding DH or inbred line is homozygous for distinct SNP alleles (CC or cc), and  $u_3$  equal to 0 if the single cross is homozygous or 1 if heterozygous.

*SNP genotypic values of single crosses from DH or inbred lines derived from the same population or heterotic group*

185 Well defined heterotic groups are known for maize, but not for special maize such as popcorn  
 186 and sweet corn and for other crops such as wheat (Zhao et al. 2013b), rice (Xu et al. 2014), and  
 187 barley (Philipp et al. 2016). Thus, for many breeders, it is interesting to know about the efficiency  
 188 of genomic prediction of single crosses when there are no heterotic groups. Assuming  $n$  DH or  
 189 inbred lines derived from the same population or heterotic group, the average genotypic values for  
 190 the single crosses concerning the SNP locus are

$$191 \quad M_{CC \times CC} = M + 2q_c \alpha_{\text{SNP}} - 2q_c^2 \kappa_{bc}^2 d_b = M + 2GCA_{CC} + SCA_{CC \times CC}$$

$$192 \quad M_{cc \times cc} = M - 2p_c \alpha_{\text{SNP}} - 2p_c^2 \kappa_{bc}^2 d_b = M + 2GCA_{cc} + SCA_{cc \times cc}$$

$$193 \quad M_{CC \times cc} = M + 2(q_c - p_c) \alpha_{\text{SNP}} + 2p_c q_c \kappa_{bc}^2 d_b = M + GCA_{CC} + GCA_{cc} + SCA_{CC \times cc}$$

194 where  $M = m_b + (p_c - q_c) a_b + 2p_c q_c d_b$  is the hybrid population mean,

195  $\alpha_{\text{SNP}} = \kappa_{bc} [a_b + (q_b - p_b) d_b] = \kappa_{bc} \alpha_b$  is the average effect of a SNP substitution in the hybrid

196 population, and  $d_{\text{SNP}} = \kappa_{bc}^2 d_b$  is the SNP dominance deviation. Notice that the SNP GCA effects

197 are equal to half the SNP additive value for the single crosses (A), the SNP SCA effects are the SNP

198 dominance deviations for the single crosses (D), and that the three genotypic values depends on

199 three unknown parameters ( $M$ ,  $\alpha_{\text{SNP}}$ , and  $d_{\text{SNP}}$ ). Notice also that  $E(GCA) = E(A) = E(SCA) =$

200  $E(SCA|CC) = E(SCA|cc) = E(D) = 0$ .

### 201 *Accuracy of single cross genomic prediction*

202 Assuming a QTL and a SNP in LD in the two groups of DH or inbred lines, the predictor of

203 the single cross QTL genotypic value is the single cross SNP genotypic value (because they are

204 proportional). Thus, the covariance between the predictor and the genotypic value is

$$\begin{aligned}
 \text{Cov}(\tilde{G}, G) &= f_{22}^1 f_{22}^2 \left[ M_H + GCA_{CC1} + GCA_{CC2} + SCA_{CC1 \times CC2} \right] \left[ M_H + GCA_{BB1} + GCA_{BB2} + SCA_{BB1 \times BB2} \right] + \\
 &+ f_{22}^1 f_{20}^2 \left[ M_H + GCA_{CC1} + GCA_{cc2} + SCA_{CC1 \times cc2} \right] \left[ M_H + GCA_{BB1} + GCA_{BB2} + SCA_{BB1 \times BB2} \right] + \\
 &\dots \\
 205 \quad &+ f_{00}^1 f_{00}^2 \left[ M_H + GCA_{cc1} + GCA_{cc2} + SCA_{cc1 \times cc2} \right] \left[ M_H + GCA_{bb1} + GCA_{bb2} + SCA_{bb1 \times bb2} \right] - (M_H)^2 \\
 &= p_{c1} q_{c1} \left( \kappa_{bc1} \alpha_{b2} \right)^2 + p_{c2} q_{c2} \left( \kappa_{bc2} \alpha_{b1} \right)^2 + 4 p_{c1} q_{c1} p_{c2} q_{c2} \left( \kappa_{bc1} \kappa_{bc2} d_b \right)^2 \\
 &= p_{c1} q_{c1} \left( \alpha_{SNP1} \right)^2 + p_{c2} q_{c2} \left( \alpha_{SNP2} \right)^2 + 4 p_{c1} q_{c1} p_{c2} q_{c2} \left( d_{SNP} \right)^2 \\
 &= \sigma_{GCA_{SNP}}^{2(1)} + \sigma_{GCA_{SNP}}^{2(2)} + \sigma_{SCA_{SNP}}^2 = \sigma_G^2(SNP)
 \end{aligned}$$

206

207 where the GCA and SCA effects for the QTL are  $GCA_{BB1} = q_{b1} \alpha_{b2}$ ,  $GCA_{bb1} = -p_{b1} \alpha_{b2}$ ,

208  $GCA_{BB2} = q_{b2} \alpha_{b1}$ ,  $GCA_{bb2} = -p_{b2} \alpha_{b1}$ ,  $SCA_{BB1 \times BB2} = -2 q_{b1} q_{b2} d_b$ ,

209  $SCA_{BB1 \times bb2} = 2 q_{b1} p_{b2} d_b$ ,  $SCA_{bb1 \times BB2} = 2 p_{b1} q_{b2} d_b$ , and  $SCA_{bb1 \times bb2} = -2 p_{b1} p_{b2} d_b$ ,

210  $\sigma_{GCA}^2$  and  $\sigma_{SCA}^2$  are the GCA and SCA variances for the SNP locus, and  $\sigma_G^2$  is the SNP

211 genotypic variance. The GCA and SCA variances for the QTL are  $\sigma_{GCA}^{2(1)} = p_{b1} q_{b1} \left( \alpha_{b2} \right)^2$ ,

212  $\sigma_{GCA}^{2(2)} = p_{b2} q_{b2} \left( \alpha_{b1} \right)^2$ , and  $\sigma_{SCA}^2 = 4 p_{b1} q_{b1} p_{b2} q_{b2} \left( d_b \right)^2$ . The QTL genotypic variance is

213  $\sigma_G^2 = \sigma_{GCA}^{2(1)} + \sigma_{GCA}^{2(2)} + \sigma_{SCA}^2$ . Thus, the single cross prediction accuracy is

$$214 \quad \rho_{\tilde{G}, G} = \sqrt{\frac{\sigma_G^2(SNP)}{\sigma_G^2}}$$

215 Assuming  $s$  SNPs,

$$216 \quad \rho_{\tilde{G}, G} = \sum_{r=1}^s \sigma_G^2(SNP(r)) / \sqrt{\sigma_G^2 \sigma_G^2}$$

217 where  $\sigma_G^2$  is the variance of the predicted single cross genotypic values and  $\sigma_G^2$  is the single cross  
 218 genotypic variance. Further,

$$219 \quad \alpha_{\text{SNP}(r)1} = \sum_{i=1}^{k'} \left[ \frac{\Delta_{ri1}}{p_{r1}q_{r1}} \right] \alpha_{i2} = \sum_{i=1}^{k'} \kappa_{ri1} \alpha_{i2}, \text{ where } k' \text{ is the number of QTLs in LD with the SNP}$$

220  $r$  in group 1, and

$$221 \quad d_{\text{SNP}(r)} = \sum_{i=1}^{k''} \left[ \frac{\Delta_{ri1}}{p_{r1}q_{r1}} \right] \left[ \frac{\Delta_{ri2}}{p_{r2}q_{r2}} \right] d_i = \sum_{i=1}^{k''} \kappa_{ri1} \kappa_{ri2} d_i \text{ where } k'' \text{ is the number of QTLs in LD with}$$

222 the SNP  $r$  in both groups

223 Notice that because the accuracy of genomic prediction of single crosses depends on the  
 224 squares of the average effects of SNP substitution and the SNP dominance deviations, it is not  
 225 affected by the linkage phase (coupling or repulsion), as it does not depend on linkage. But it  
 226 depends on the magnitude of the LD in each group of DH or inbred lines.

227 Assuming single crosses derived from DH or inbred lines of a single population or heterotic  
 228 group we have  $\sigma_{G(\text{SNP})}^2 = 2p_c q_c (\alpha_{\text{SNP}})^2 + (2p_c q_c d_{\text{SNP}})^2$  and

$$229 \quad \sigma_G^2 = 2p_b q_b (\alpha_b)^2 + (2p_b q_b d_b)^2.$$

### 230 **The statistical model for single cross genomic prediction**

231 Assume  $n_1$  and  $n_2$  (several tens) DH or inbred lines from two populations or heterotic groups  
 232 genotyped for  $s$  (thousands) SNPs and the experimental assessment of  $h$  (few hundred) single-  
 233 crosses ( $h$  much lower than  $n_1, n_2$ ) in  $e$  (several) environments (a combination of growing seasons,  
 234 years, and locals). Defining  $y$  as the adjusted single cross phenotypic mean, the statistical model  
 235 for prediction of the average effects of SNP substitution and the SNP dominance deviations is

$$236 \quad y = M_H + \sum_{r=1}^s \left( z_{1r} \alpha_{\text{SNP}1r} + z_{2r} \alpha_{\text{SNP}2r} + z_{3r} d_{\text{SNP}r} \right) + \text{error}$$

237 where  $z_{1_r} = q_{r1}$ ,  $z_{2_r} = q_{r2}$ , and  $z_{3_r} = -2q_{r1}q_{r2}$  if the SNP genotypes for the DH or inbred lines  
238 are CC (group 1) and CC (group 2),  $z_{1_r} = -p_{r1}$ ,  $z_{2_r} = -p_{r2}$ , and  $z_{3_r} = -2p_{r1}p_{r2}$  if the SNP  
239 genotypes for the DH or inbred lines are cc (group 1) and cc (group 2),  $z_{1_r} = q_{r1}$ ,  $z_{2_r} = -p_{r2}$ , and  
240  $z_{3_r} = 2q_{r1}p_{r2}$  if the SNP genotypes for the DH or inbred lines are CC (group 1) and cc (group 2),  
241 and  $z_{1_r} = -p_{r1}$ ,  $z_{2_r} = q_{r2}$ , and  $z_{3_r} = p_{r1}q_{r2}$  if the SNP genotypes for the DH or inbred lines are  
242 cc (group 1) and CC (group 2).

243 Regarding the single crosses obtained from DH or inbred lines of the same population or  
244 heterotic group we have

$$245 \quad y = M + \sum_{r=1}^s \left( z_{1_r} \alpha_{\text{SNP}_r} + z_{2_r} d_{\text{SNP}_r} \right) + \text{error}$$

246 where  $z_{1_r} = 2q_r$  and  $z_{2_r} = -2q_r^2$  if the SNP genotypes for the two crossed DH or inbred lines are  
247 CC and CC,  $z_{1_r} = -2p_r$  and  $z_{2_r} = -2p_r^2$  if the SNP genotypes for the two DH or inbred lines are  
248 cc and cc, and  $z_{1_r} = 2(q_r - p_r)$  and  $z_{2_r} = 2p_rq_r$  if the SNP genotypes for the two DH or inbred  
249 lines are CC and cc.

250 The statistical problem of genomic prediction when there are a very large number of  
251 molecular markers and relatively few observations have been addressed thorough several  
252 regularized whole-genome regression and prediction methods (Daetwyler et al. 2013; de Los  
253 Campos et al. 2013). Based on one of these approaches, the SNP average effects of substitution and  
254 SNP dominance deviations are predicted and used to provide genomic prediction of non-assessed  
255 single crosses. The predicted genotypic value for a non-assessed single cross of DH or inbred lines  
256 from two groups is

$$257 \quad \tilde{G} = \hat{M}_H + \sum_{r=1}^s \left( z_{1_r} \tilde{\alpha}_{\text{SNP}_{1_r}} + z_{2_r} \tilde{\alpha}_{\text{SNP}_{2_r}} + z_{3_r} \tilde{d}_{\text{SNP}_{1_r}} \right)$$

258 For a non-assessed single cross of DH or inbred lines from the same group, the predicted  
259 genotypic value is

$$260 \quad \tilde{G} = \hat{M} + \sum_{r=1}^s \left( z_{1_r} \tilde{\alpha}_{\text{SNP}_{1_r}} + z_{2_r} \tilde{d}_{\text{SNP}_{1_r}} \right)$$

## 261 Simulation

262 The SNP and QTL genotypic data for DH lines, the QTL genotypic data of single crosses, and  
263 the phenotypic data for DH lines and single crosses were simulated using the software  
264 *REALbreeding*. The program has been developed by the first author using the software *REALbasic*  
265 *2009* (Viana et al. 2017a; Viana et al. 2017b; Viana et al. 2016; Azevedo et al. 2015; Viana et al.  
266 2013). Based on our input, the software distributed 10,000 SNPs and 400 QTLs in ten  
267 chromosomes (1,000 SNPs and 40 QTLs by chromosome). The average SNP density was 0.1 cM.  
268 The QTLs were distributed in the regions covered by the SNPs (approximately 100  
269 cM/chromosome). Initially, *REALbreeding* sampled 700 DH lines from two non-inbred populations  
270 (heterotic groups) in LD (350 from each population). The populations were composites of two  
271 populations in linkage equilibrium. In a composite, there is LD only for linked SNPs and QTLs  
272 (Viana et al. 2016). The number of DH lines from each  $S_0$  plant was one (scenario 1) or ranged  
273 from 1 to 5 (scenario 2). We also sampled 350 DH lines from each population after three  
274 generations of selfing (using a single seed descent process). The number of DH lines from each  $S_3$   
275 plant ranged from 1 to 5 (scenario 3). For each scenario, the software then crossed 70 selected DH  
276 lines from each population, using a diallel design. The heritability for the DH lines was 30%.

277 The genotypic values of the DH lines and of the single crosses were generated assuming a  
278 single set of 400 QTLs and two degrees of dominance. To simulate grain yield and expansion  
279 volume, a measure of popcorn quality, we defined positive dominance ( $0 < (d/a)_i \leq 1.2$ ,  $i = 1, \dots$ ,

280 400) and bidirectional dominance ( $-1.2 \leq (d/a)_i \leq 1.2$ ), respectively, where  $d/a$  is the degree of  
281 dominance. To compute the genotypic values, *REALbreeding* used our input relative to the  
282 maximum and minimum genotypic values for homozygotes. For grain yield and expansion volume,  
283 we defined 140 and 30 g/plant and 55 and 15 mL/g, respectively. The phenotypic values were  
284 obtained from the sum of the population mean, genotypic value, and experimental error. The error  
285 variance was computed from the broad sense heritability. To avoid outliers, we defined the  
286 maximum and minimum phenotypic values as 160 and 10 g/plant and 65 and 5 mL/g.

287 The heritabilities for the assessed single crosses were 30, 60, and 100%. Thus, the genotypic  
288 value prediction accuracies of the assessed single crosses were 0.55, 0.77, and 1.00, respectively.  
289 For each scenario were processed 50 resamplings of 30 and 10% of the single crosses (1,470 and  
290 490 assessed single crosses). That is, we predicted 70 and 90% of the single crosses (3,430 and  
291 4,410 non-assessed single crosses). Additionally, to assess the relevance of the number of DH lines  
292 sampled, we fixed the number of DH lines to achieve the same number of assessed single crosses,  
293 using a diallel. That is, we sampled 50 times 38 and 22 DH lines in each group for a diallel  
294 (scenario 4), generating 1,444 and 484 single crosses for assessment, respectively. We denote these  
295 processes as sampling of single crosses (scenarios 1 to 3) and sampling of DH lines (scenario 4).  
296 Other additional scenarios were: genomic prediction of single crosses from selected DH lines from  
297 same heterotic group (interestingly for wheat, rice, and barley breeders, for example) (scenario 5)  
298 and from selected DH lines from populations with lower LD (scenario 6), to emphasize that the  
299 prediction accuracy depends on the LD in the groups of DH or inbred lines. A last scenario  
300 (seventh) was genomic prediction of single crosses under an average density of one SNP each cM.  
301 This lower density was obtained by random sampling of 100 SNPs per chromosome using a  
302 *REALbreeding* tool (*sampler*). To investigate the single cross prediction efficiency based on our  
303 model and on the models proposed by Massman et al. (2013) and Technow et al. (2012), we used  
304 another *REALbreeding* tool (*Incidence matrix*) to generate the incidence matrices for the three

305 models and for the two DH lines sampling processes. To assess the relevance of the SCA effects  
306 prediction on genomic prediction of single cross performance, we also fitted the additive model  
307 (including only the GCA effects). For comparison purpose, we also processed single cross  
308 prediction based on GBLUP (with the observed additive and dominance relationship matrices) and  
309 pedigree-based BLUP (with the expected additive and dominance relationship matrices).

### 310 **Statistical analysis**

311 The methods used for prediction were ridge regression BLUP (RR-BLUP), GBLUP and  
312 BLUP. For the analyses we used the *rrBLUP* package (Endelman 2011). The accuracies of single  
313 cross genotypic value prediction were obtained by the correlation between the true values of the  
314 non-assessed single crosses computed by *REALbreeding* and the values predicted by RR-BLUP,  
315 GBLUP, and BLUP. We also computed the efficiency of identification of the 300 non-assessed  
316 single crosses of higher genotypic value (coincidence index). The coincidence index was computed  
317 from the 300 higher predicted untested single crosses as the number of predicted untested single  
318 crosses among the 300 untested single crosses of greater true genotypic value/300. For each DH  
319 lines derivation process and heritability, the parametric average coincidence index was computed  
320 from the average phenotypic values of the 4,900 single crosses as the number of single crosses  
321 among the 300 single crosses of greater true genotypic value/300. Regarding grain yield, for  
322 heritability of 30% the coincidence index was 0.2533, 0.2833, and 0.2433 assuming one DH line  
323 per  $S_0$  plant, one to five DH lines per  $S_0$  plant, and one to five DH lines per  $S_3$  plant, respectively.  
324 The corresponding values for heritability of 60% were, respectively, 0.4800, 0.4900, and 0.4567.  
325 Concerning expansion volume, the corresponding values for heritabilities of 30 and 60% were,  
326 respectively, 0.2600, 0.2833, and 0.2700, and 0.4733, 0.5100, and 0.4533. The assumed average  
327 parametric coefficient index was 0.26 and 0.48 for heritabilities of 30 and 60%, respectively, for  
328 both traits. For the population structure analysis we employed *Structure* (Falush et al. 2003) and  
329 fitted the no admixture model with independent allelic frequencies. The number of SNPs, sample



330 size, burn-in period, and number of MCMC (Markov chain Monte Carlo) replications were 1,000  
331 (sampled at random), 140 (70 DH lines from each population), 10,000, and 40,000, respectively.  
332 The number of populations assumed ( $K$ ) ranged from 1 to 4, and the most probable  $K$  value was  
333 determined based on the inferred plateau method (Viana et al. 2013). The LD analyses were  
334 performed with *Haploview* (Barrett et al. 2005).

### 335 **Data availability**

336 *REALbreeding* is available upon request. The data set is available at  
337 <https://doi.org/10.6084/m9.figshare.5035130.v3>. Data citation:

338 Viana, José Marcelo Soriano; Pereira, Helcio Duarte; Mundim, Gabriel Borges; Piepho, Hans-Peter;  
339 Fonseca e Silva, Fabyano (2017): Efficiency of genomic prediction of non-assessed single crosses.  
340 figshare. <https://doi.org/10.6084/m9.figshare.5035130.v3>

## 341 **RESULTS**

342 The parametric mean and genotypic variance in the populations 1 and 2 were 108.5 and 87.3  
343 (g/plant) and 4.7680 and 6.2580 (g/plant)<sup>2</sup>, respectively. The DH lines derivation processes (one  
344 and one to five per  $S_0$  plant and one to five per  $S_3$  plant) provided, for each population, selected DH  
345 lines with similar mean (approximately 97 and 76 g/plant for populations 1 and 2), inbreeding  
346 depression (approximately -10 and -13% for populations 1 and 2), and genotypic variance  
347 (approximately 6 and 7 (g/plant)<sup>2</sup> for populations 1 and 2) and groups of single crosses also similar  
348 for mean (approximately 103 g/plant), heterosis (approximately 19%), and genotypic variance  
349 (approximately 4 (g/plant)<sup>2</sup>). Because we derived one to few DH lines from unrelated  $S_0$  and  $S_3$   
350 plants, the average level of relatedness between the selected DH lines was very low (zero and zero,  
351 0.0041 and 0.0041, and 0.0054 and 0.0074 assuming one DH line per  $S_0$ , one to five DH lines per  
352  $S_0$ , and one to five DH lines per  $S_3$ , for populations 1 and 2, respectively). Concerning SNP data,  
353 the frequency distribution of the minor allele frequency (MAF) and the absolute value of the  
354 difference between a SNP allele frequency were also similar for both groups of selected DH lines,

355 regardless of the DH line derivation process (Figure 1a, b, c). The average MAF was 0.33,  
356 regardless of the population and DH line derivation process. However, the evidence obtained by the  
357 population structure analysis was that the DH lines belong to two distinct subpopulations (suggested  
358  $K$  equal to 2.4 by the inferred plateau method). The percentages of non-polymorphic SNPs were  
359 very low (0.1 to 0.4%). No differences between allelic frequencies were observed for only 1.7 to  
360 2.1% of the SNPs. For approximately 70% of the SNPs, the absolute difference between allelic  
361 frequencies ranged from 0.1 to 0.6. Regarding LD, for the groups of selected DH lines the evidence  
362 based on the analysis of chromosome 1 (no difference between chromosomes is expected) is that  
363 LD extents for up to 35 cM, regardless of the DH lines derivation process (Figure 1c, d). Ignoring  
364 the non-significant LD values (LOD score lower than 3), for 17 to 20% of the SNP pairs the  $r^2$   
365 values ranged from 0.2 to 0.5 (average of 0.16, regardless of the DH lines group and derivation  
366 process).

367 Assuming our model, average SNP density of 0.1 cM, training set size of 30%, positive  
368 dominance (grain yield), additive-dominance model, and sampling of single crosses, the prediction  
369 accuracies of the non-assessed single crosses were greater than the accuracies of the assessed single  
370 crosses for low (up to 46% higher) and intermediate (up to 16% higher) heritabilities (Table 1;  
371 Figure 2a). As the prediction accuracy of assessed single crosses approaches 1.0, the accuracy of the  
372 non-assessed single crosses approaches approximately 0.9 (up to 11% lower). Sampling one to five  
373 DH lines per  $S_3$  plant was only slightly superior to the other DH lines derivation processes,  
374 regardless of the prediction accuracy of the assessed single crosses (up to 5% higher). Fitting the  
375 additive model provided essentially the same prediction accuracies since the maximum decrease  
376 was approximately 1%. No significant differences between the prediction accuracies of non-  
377 assessed single crosses were also observed assuming bidirectional dominance (expansion volume).  
378 The differences compared to positive dominance ranged from approximately -5 to 2%. However, a  
379 striking difference was observed between the sampling processes of single crosses for testing.

380 Random sampling of single crosses provided higher prediction accuracies of non-assessed single  
381 crosses, compared to sampling DH lines for a diallel. The increases in the accuracies by sampling  
382 single crosses ranged from approximately 38 to 77%, proportional to the heritability. Decreasing the  
383 average SNP density to 1 cM led to a slight decrease in the prediction accuracy of non-assessed  
384 single crosses of approximately -4%). Decreasing the training set size to 10% decreased the  
385 prediction accuracy of non-assessed single crosses in approximately -5 to -15%, inversely  
386 proportional to the heritability. To establish that the prediction accuracy of non-assessed single  
387 crosses depends on the level of (overall) LD in the groups of selected DH or inbred lines, we  
388 derived DH lines from the same base populations after 10 generations of random crosses (to  
389 decrease the LD). The accuracies were also high, ranging from 0.83 to 0.95, proportional to the  
390 heritability. The prediction accuracies of non-assessed single crosses from DH lines of the same  
391 population were equivalent to the accuracies for single crosses derived from DH lines belonging to  
392 distinct heterotic groups, ranging from 0.83 to 0.91, also proportional to the heritability. Comparing  
393 our statistical model with the models proposed by Massman et al. (2013) and Technow et al. (2012),  
394 we observed no differences for the prediction accuracies of non-assessed single crosses (maximum  
395 difference of 1%). Interestingly, the Massman et al. (2013) and Technow et al. (2012) models  
396 provide identical accuracies. Finally, no significant differences between the prediction accuracies  
397 for RR-BLUP, GBLUP, and BLUP occurred (maximum of 2%), excepting for one to five DH lines  
398 per  $S_3$  plant, where BLUP was 9 to 10% inferior, regardless of the heritability.

399 Concerning the coincidence index, in general the inferences are the same established from the  
400 prediction accuracy analysis (Table 2; Figure 2b). There were no differences between the  
401 coincidence indexes regarding our model and the models proposed by Massman et al. (2013) and  
402 Technow et al. (2012) (maximum difference of 3%), and between the RR-BLUP, GBLUP, and  
403 BLUP approaches, except for one to five DH lines per  $S_3$  plant, where BLUP was -19 to -27%  
404 inferior, proportional to the heritability. The coincidence indexes were also high for single crosses

405 derived from selected DH lines obtained from the base populations with lower LD (ranging from  
406 0.55 to 0.76, proportional to the heritability) and from selected DH lines of the same population  
407 (ranging from 0.61 to 0.76, also proportional to the heritability). Sampling single crosses for  
408 assessment also provided higher coincidence index compared to sampling DH lines for a diallel (39  
409 to 98% higher, proportional to the heritability). Decreasing the SNP density and the training set size  
410 decreased the coincidence index from 5 to 10% (proportional to the heritability) and from 17 to  
411 26% (inversely proportional to the heritability), respectively. The maximum difference in the  
412 coincidence index by fitting the additive-dominant and the additive models was -3%. Only for one  
413 DH line per  $S_0$  plant the coincidence indexes assuming bidirectional dominance were slightly  
414 greater than the values assuming positive dominance (9 to 14% greater). This sampling process of  
415 DH lines provided the higher values of coincidence index, compared to the other sampling  
416 processes (7 to 26% higher, inversely proportional to the heritability). Finally, the coincidence  
417 index of the non-assessed single crosses are greater than the parametric values for all assessed  
418 single crosses assuming low (up to 117% higher) and intermediate (up to 39% higher) heritabilities  
419 (Table 1). However, as the parametric coincidence of assessed single crosses approaches 1.0, the  
420 coincidence values of the non-assessed single crosses approach approximately 0.60 to 0.74 (up to  
421 26 to 40% lower), depending on the DH line sampling process.

422

## DISCUSSION

423 Twenty-three years ago, Bernardo (1994) first suggested to use BLUP for predicting untested  
424 maize single cross performance. Based on the prediction accuracies obtained by Bernardo (1994,  
425 1995, 1996a, 1996b, 1996c), for grain yield and other traits (distinct genetic controls), a breeder  
426 should realize that the performance of untested single crosses can be effectively predicted using  
427 relationship information from molecular or pedigree data, unbalanced and large data set, and  
428 diverse heterotic patterns. The significance of genomic prediction has been confirmed with maize  
429 (Zhao et al. 2015) and other important crops, as rice (Xu et al. 2014), wheat (Zhao et al. 2013b) and

430 barley (Philipp et al. 2016), along the last 10 years. Why, then, is there no published evidence that  
431 prediction of untested single crosses is of general use by breeders of worldwide seed companies?  
432 What should be additionally proved to make prediction of untested single crosses as successful as  
433 the Jenkins' (1934) method for predicting double crosses performance was? We believe that this  
434 paper offers a significant contribution.

435 Our assessment on efficiency of prediction of untested single cross performance keeps some  
436 similarities with few earlier studies but sharp differences for most previous investigations. This  
437 study is based on simulated data set, as the study of Technow et al. (2012), assuming 400 QTLs  
438 distributed along ten chromosomes. Thus, the prediction accuracies and coincidence indexes (a  
439 measure of untested single crosses selection efficiency) are available for non-assessed single crosses  
440 since the values were computed based on the true genotypic values of the non-assessed single  
441 crosses and not on a cross-validation procedure involving assessed single crosses. This does not  
442 mean that we consider simulated data better than field data or have any criticism on the cross-  
443 validation procedure. We know that simulated data, because the assumptions, cannot integrally  
444 describe the complexity of populations and genetic determination of traits (Daetwyler et al. 2013).  
445 To highlight the relevance of (overall) LD, our study is based on scenarios not favorable to  
446 prediction of untested single cross performance: very low level of relationship between the DH  
447 lines, low and intermediate heritabilities for the assessed single crosses, and not higher heterotic  
448 pattern. In the studies of Massman et al. (2013) and Bernardo (1994, 1995, 1996a) the relationship  
449 among inbreds from the same heterotic group ranged from 0.11 to 0.58. Riedelsheimer et al. (2012)  
450 observed high relationship only between the non-Stiff Stalk inbreds. Technow et al. (2012) assumed  
451 non-related inbreds. For most of the investigations on prediction of untested single crosses and  
452 testcrosses, the grain yield heritability ranged from 0.72 to 0.88. The common heterotic patterns in  
453 these previous studies are Stiff Stalk and non-Stiff Stalk, and Dent and Flint. The MAF in the

454 groups of Dent and Flint inbreds were approximately 0.10 and 0.20, respectively, and  
455 approximately 20% of the SNPs showed a difference of allelic frequency of at least 0.6.

456       Concerning the prediction accuracy and the efficiency of identification of the superior 300  
457 non-assessed single crosses, our results prove that prediction of untested single crosses is a very  
458 efficient procedure (note that we are not saying genomic prediction), especially for low and  
459 intermediate heritabilities of the assessed single crosses. The prediction accuracy of the non-  
460 assessed single crosses under low (0.55 to 0.71) and intermediate (0.74 to 0.87) accuracies of  
461 assessed single crosses achieved 0.85 and 0.89, respectively. It is important to highlight that these  
462 are not relative accuracies. Most important, the coincidence of the non-assessed single crosses  
463 under low (0.26 to 0.39) and intermediate (0.44 to 0.66) parametric coincidences of assessed single  
464 crosses achieved 0.59 and 0.64, respectively. For high heritability (80 to 95%; accuracies from 0.89  
465 to 0.97), as observed in most of the studies on prediction of untested single cross performance, we  
466 can state (based on values predicted by fitting a quadratic regression model) that the prediction  
467 accuracy of non-assessed single crosses is up to only 10% lower (0.87 to 0.92) and, most  
468 impressive, the coincidence index can range from 0.61 to 0.71 (parametric coincidences between  
469 0.72 to 0.93). Under maximum accuracy of assessed single crosses (1.0), the prediction accuracy  
470 and coincidence of non-assessed single crosses achieved 0.93 and 0.76. Thus, assuming high  
471 heritability, high density, and training set size of 30%, the accuracy can achieve 0.92 and the  
472 efficiency of identification of the best 9% of the non-assessed single crosses can achieve 0.71. It is  
473 important to highlight that this efficacy can be higher by using more related DH or inbred lines,  
474 under high LD. Thus, we strong recommend that maize breeders, as well as rice, wheat, and barley  
475 breeders, make widespread use of prediction of non-assessed single crosses, at least for preliminary  
476 screening or prior to field testing.

477       To take advantage of genomic prediction, Kadam et al. (2016) recommend redesigning hybrid  
478 breeding programs. However, because breeders are unlikely to rely solely on genomic predictions

479 when selecting superior untested hybrids, Technow et al. (2014) believe that genomic prediction  
480 will be combined with field testing of the most promising experimental hybrids. For grain yield, the  
481 prediction accuracies observed by Bernardo (1994, 1995, 1996a) ranged from 0.14 to 0.80,  
482 proportional to the heritability (in the range 35-74%) and training set size. The non-relative  
483 accuracies (relative accuracy x root square of heritability) observed in the studies of Kadam et al.  
484 (2016), Technow et al. (2014), Massman et al. (2013), Technow et al. (2012), and Riedelsheimer et  
485 al. (2012) ranged between 0.20 and 0.86, also proportional to the heritability (in the range 53-98%)  
486 and training set size.

487 We hope that readers of this paper have realized the importance of (overall) LD for effective  
488 prediction of non-assessed single crosses, as well as genetic variability (see the parametric accuracy  
489 of genomic prediction). Breeders have no control over LD and relatedness between the DH or  
490 inbred lines. However, selection should always provide high level of overall LD in the groups of  
491 selected DH or inbred lines. Comparison of our LD assessment with the LD analyses from other  
492 studies is inadequate because we have distances in cM and not in base-pairs. But in general the level  
493 of LD was high ( $r^2$  of approximately 0.3) only for SNPs separated by up to 0.5 Mb (Technow et al.  
494 2014; Massman et al. 2013; Technow et al. 2012; Riedelsheimer et al. 2012). To maximize the  
495 prediction accuracy and the efficiency of identification of the best non-assessed single crosses it is  
496 necessary to adopt the random sampling of single crosses for testing instead of the random sampling  
497 of DH or inbred lines for a diallel. This is because sampling 30 or even 10% of the single crosses  
498 leads to single crosses for testing derived from all DH or inbred lines from each group. In our case,  
499 in every resampling assuming training set size of 30 and 10% we always get groups of assessed  
500 single crosses (1,470 and 490 single crosses, respectively) derived from the 70 DH lines of each  
501 group. However, sampling DH lines for a diallel provided 1,440 and 484 single crosses for testing  
502 derived from 38 and 22 DH lines, respectively. Thus, the sampling of single crosses provides best  
503 prediction of the SNP average effects of substitution. Riedelsheimer et al. (2012) emphasized the

504 need for large genetic variability to obtain high prediction accuracies. Further, their results indicated  
505 that pairs of closely related lines and population structuring only weakly contributed to the high  
506 prediction accuracies. Regarding dominance, because it can be a relevant genetic effect, breeders  
507 should always fit the additive-dominance model to maximize the prediction accuracy and the  
508 efficiency of identification of the best non-assessed single crosses. Interestingly, in most of the  
509 studies on prediction of non-assessed single crosses the prediction accuracy did not significantly  
510 increase when modeling SCA in addition to GCA effects (Zhao et al. 2015).

511       Concerning SNP density and training set size, factors related with the costs of genotyping and  
512 phenotyping, breeders should find a balance between efficiency and expenses, since maximizing  
513 SNP density and training set size maximizes the efficiency of untested single cross prediction.  
514 Based on our results, because the decreases in the prediction accuracy (approximately 4%) and  
515 coincidence index (5 to 10%) by decreasing the average SNP density from 0.1 to 1 cM are of  
516 reduced magnitude, we consider sufficient to employ custom genotyping to provide an average SNP  
517 density of 1 cM. Decreasing the training set size from 30 to 10% of the single crosses does not  
518 significantly affect the prediction accuracy under intermediate to high heritability (decrease of up to  
519 9%), but the coincidence index can be reduced in up to 21%. However, considering that the  
520 coincidence index will be kept in the range 0.48 to 0.61, proportional to the heritability, and that the  
521 maximum values are in the range 0.48 to 0.61, we also consider sufficient to assess at least 10% of  
522 the possible single crosses. As highlighted by Zhao et al. (2015), marker density only marginally  
523 affects the prediction accuracy of untested single crosses and, for biparental populations, a plateau  
524 for the accuracy is reached with a few hundred markers. Technow et al. (2014) did not find an  
525 improvement of prediction accuracies by using higher SNP density. Additionally, the increase in the  
526 training set size led to a relative small increase in the prediction accuracy. However, the prediction  
527 accuracies obtained by Riedelsheimer et al. (2012) under high density (38,019 SNPs) were  
528 substantially greater than those reached with a low-density marker panel (1,152 SNPs). In the study



529 of Technow et al. (2012), the prediction accuracies increased with SNP density and number of  
530 parents tested in hybrid combination.

531 The DH lines sampling process, the heterotic pattern, and the statistical approach should not  
532 be worries for breeders. However, under high heritability notice that sampling more than one DH  
533 line per  $S_0$  or  $S_3$  plant provided the higher coincidence values and high prediction accuracy in our  
534 study. For rice, wheat, and barley breeders our message is: high prediction accuracy and high  
535 efficiency of identification of superior non-assessed single crosses does not depend on heterotic  
536 groups but on the (overall) LD in the group or in each group of DH or inbred lines. In other words,  
537 the efficiency of prediction of non-assessed single crosses derived from DH or inbred lines from the  
538 same population can be as high as the efficiency of prediction of untested single crosses derived  
539 from DH or inbred lines from distinct heterotic groups. This is not confirmed comparing the relative  
540 prediction accuracies for grain yield of maize untested single crosses (from approximately 0.50 to  
541 0.95, for most studies) with those obtained with rice, wheat, and barley untested hybrids (0.50 to  
542 0.60, approximately) (Philipp et al. 2016; Xu et al. 2014; Zhao et al. 2013b). However, the lower  
543 relative prediction accuracies for untested rice, wheat, and barley hybrids should be due to  
544 prediction of two- and three-way crosses. Regarding the statistical approach, our model did not  
545 provide an increase in the efficiency of non-assessed single cross prediction, compared to the  
546 models proposed by Massman et al. (2013) and Technow et al. (2012). It is important to highlight  
547 that our results showed that these two models are really identical (data no shown). Thus, because  
548 the simplified definition of the incidence matrices for these two previous models, it is quite safe to  
549 use any of them. Finally, the choice between the statistical approaches RR-BLUP (prediction of  
550 genotypic values of non-assessed single crosses based on prediction of SNP average effects of  
551 substitution), GBLUP (prediction of genotypic values of non-assessed single crosses based on  
552 additive and dominance genomic matrices), and BLUP (prediction of genotypic values of non-  
553 assessed single crosses based on additive and dominance matrices from pedigree records) is not a

554 serious worry for breeders too. Our evidence is that there is no significant difference between RR-  
555 BLUP and GBLUP regarding prediction accuracy and efficiency of identification of the best  
556 untested single crosses. Further, even when the level of relatedness between the DH or inbred lines  
557 in each group is low, in general pedigree-based BLUP is as efficient as genomic prediction,  
558 excepting when the DH lines are derived from inbred population. Thus, DNA polymorphism is not  
559 essential for an efficient prediction of non-assessed single cross performance. In a review on  
560 genomic selection in hybrid breeding, Zhao et al. (2015) state that the choice of the biometrical  
561 model has no substantial impact on the prediction accuracy of untested single crosses. Technow et  
562 al. (2014) observed that prediction methods GBLUP and BayesB resulted in very similar prediction  
563 accuracies. According to Massman et al. (2013), pedigree-based BLUP and RR-BLUP models did  
564 not lead to prediction accuracies that differed significantly. Comparing GBLUP and BayesB,  
565 Technow et al. (2012) concluded that the latter method produced significantly higher accuracies for  
566 the additive-dominance model.

567 Our main contributions on the assessment of prediction efficiency of untested single cross  
568 performance are: 1) the prediction accuracy of untested single crosses ranged from approximately  
569 0.80 to 0.90 as the heritability of tested single crosses ranged from low (30%) to high (100%);  
570 however, the efficacy of identification of the best 9% of the untested single crosses ranged from  
571 approximately 0.50 to 0.70, depending on the DH lines sampling process; 2) the prediction accuracy  
572 for crops showing no defined heterotic pattern can be as efficient as with maize, for which there are  
573 well defined heterotic groups; this is because the most important factor affecting the prediction  
574 efficiency is the overall LD; 3) to maximize prediction accuracy and coincidence the choice of  
575 single crosses for testing should be based on a random process; this procedure maximizes the  
576 number of DH lines in hybrid combinations and provides better predictions of the SNP average  
577 effects of substitution and dominance deviations, compared to sampling DH lines for a diallel; 4)  
578 because non significant decreases in the prediction accuracy and coincidence, the prediction of

579 untested single crosses can be efficient assuming reduced training set size (10%) and SNP density  
580 of 1 cM; 5) RR-BLUP and GBLUP provide equivalent prediction efficiencies of untested single  
581 crosses; 6) excepting for DH lines derived from inbred populations, pedigree-based BLUP is as  
582 efficient as genomic prediction of untested single crosses; and 7) the theoretical accuracy shows that  
583 the prediction accuracy is not affected by the linkage phase.

#### 584 **ACKNOWLEDGMENTS**

585 We thank the National Council for Scientific and Technological Development (CNPq), the  
586 Brazilian Federal Agency for Support and Evaluation of Graduate Education (Capes) and the  
587 Foundation for Research Support of Minas Gerais State (Fapemig) for financial support.

#### 588 **LITERATURE CITED**

- 589 Albrecht, T., H.-J. Auinger, V. Wimmer, J.O. Ogutu, C. Knaak *et al.*, 2014 Genome-based  
590 prediction of maize hybrid performance across genetic groups, testers, locations, and years.  
591 *Theoretical and Applied Genetics* 127 (6):1375-1386.
- 592 Albrecht, T., V. Wimmer, H.-J. Auinger, M. Erbe, C. Knaak *et al.*, 2011 Genome-based prediction  
593 of testcross values in maize. *Theoretical and Applied Genetics* 123 (2):339-350.
- 594 Azevedo, C.F., M.D. Vilela de Resende, F. Fonseca e Silva, J.M. Soriano Viana, M.S. Ferreira  
595 Valente *et al.*, 2015 Ridge, Lasso and Bayesian additive-dominance genomic models. *BMC*  
596 *Genet* 16.
- 597 Barrett, J.C., B. Fry, J. Maller, and M.J. Daly, 2005 Haploview: analysis and visualization of LD  
598 and haplotype maps. *Bioinformatics* 21 (2):263-265.
- 599 Bernardo, R., 1996a Best linear unbiased prediction of maize single-cross performance. *Crop*  
600 *Science* 36: 50-56.
- 601 Bernardo, R., 1996b Best linear unbiased prediction of maize single-cross performance given  
602 erroneous inbred relationships. *Crop Science* 36: 862-866.

- 603 Bernardo, R., 1996c Best linear unbiased prediction of the performance of crosses between untested  
604 maize inbreds. *Crop Science* 36: 872-876.
- 605 Bernardo, R., 1995 Genetic models for predicting maize single-cross performance in unbalanced  
606 yield trial data. *Crop Science* 35: 141-147.
- 607 Bernardo, R., 1994 Prediction of maize single-cross performance using RFLPs and information  
608 form related hybrids. *Crop Science* 34: 20-25.
- 609 Daetwyler, H.D., M.P.L. Calus, R. Pong-Wong, G. de los Campos, and J.M. Hickey, 2013 Genomic  
610 Prediction in Animals and Plants: Simulation of Data, Validation, Reporting, and  
611 Benchmarking. *Genetics* 193 (2):347-+.
- 612 de Los Campos, G., J.M. Hickey, R. Pong-Wong, H.D. Daetwyler, and M.P. Calus, 2013 Whole-  
613 genome regression and prediction methods applied to plant and animal breeding. *Genetics* 193  
614 (2):327-345.
- 615 Endelman, J.B., 2011 Ridge Regression and Other Kernels for Genomic Selection with R Package  
616 rrBLUP. *Plant Genome* 4 (3):250-255.
- 617 Falush, D., M. Stephens, and J.K. Pritchard, 2003 Inference of population structure using multilocus  
618 genotype data: linked loci and correlated allele frequencies. *Genetics* 164:1567-1587.
- 619 Jonas, E., and D.J. de Koning, 2013 Does genomic selection have a future in plant breeding? *Trends*  
620 *in Biotechnology* 31 (9):497-504.
- 621 Jenkins, M.T., 1934 Methods of estimating the performance of double crosses in corn. *Journal of*  
622 *the American Society of Agronomy* 26:199-204.
- 623 Kadam, D.C., S.M. Potts, M.O. Bohn, A.E. Lipka, and A.J. Lorenz, 2016 Genomic Prediction of  
624 Single Crosses in the Early Stages of a Maize Hybrid Breeding Pipeline. *G3-Genes Genomes*  
625 *Genetics* 6 (11):3443-3453.
- 626 Kempthorne, O., 1957 *An Introduction to Genetic Statistics*. John Wiley and Sons Inc., New York.

- 627 Li, Z., N. Philipp, M. Spiller, G. Stiewe, J.C. Reif *et al.*, 2017 Genome-Wide Prediction of the  
628 Performance of Three-Way Hybrids in Barley. *Plant Genome* 10 (1).
- 629 Massman, J.M., A. Gordillo, R.E. Lorenzana, and R. Bernardo, 2013 Genomewide predictions from  
630 maize single-cross data. *Theor Appl Genet* 126 (1):13-22.
- 631 Meuwissen, T., B. Hayes, and M. Goddard, 2013 Accelerating Improvement of Livestock with  
632 Genomic Selection. *Annual Review of Animal Biosciences, Vol 1* 1:221-237.
- 633 Philipp, N., G.Z. Liu, Y.S. Zhao, S. He, M. Spiller *et al.*, 2016 Genomic Prediction of Barley  
634 Hybrid Performance. *Plant Genome* 9 (2).
- 635 Riedelsheimer, C., A. Czedik-Eysenberg, C. Grieder, J. Lisec, F. Technow *et al.*, 2012 Genomic  
636 and metabolic prediction of complex heterotic traits in hybrid maize. *Nature Genetics* 44  
637 (2):217-220.
- 638 Technow, F., C. Riedelsheimer, T.A. Schrag, and A.E. Melchinger, 2012 Genomic prediction of  
639 hybrid performance in maize with models incorporating dominance and population specific  
640 marker effects. *Theoretical and Applied Genetics* 125 (6):1181-1194.
- 641 Technow, F., T.A. Schrag, W. Schipprack, E. Bauer, H. Simianer *et al.*, 2014 Genome Properties  
642 and Prospects of Genomic Prediction of Hybrid Performance in a Breeding Program of Maize.  
643 *Genetics* 197 (4):1343-U1469.
- 644 Van Eenennaam, A.L., K.A. Weigel, A.E. Young, M.A. Cleveland, and J.C.M. Dekkers, 2014  
645 Applied Animal Genomics: Results from the Field. *Annual Review of Animal Biosciences, Vol*  
646 *2* 2:105-139.
- 647 Viana, J.M.S., H.-P. Piepho, and F.F. Silva, 2016 Quantitative genetics theory for genomic  
648 selection and efficiency of breeding value prediction in open-pollinated populations. *Scientia*  
649 *Agricola* 73 (3):243-251.

- 650 Viana, J.M.S., H.P. Piepho, and F.F. Silva, 2017a Quantitative genetics theory for genomic  
651 selection and efficiency of genotypic value prediction in open-pollinated populations. *Scientia*  
652 *Agricola* 74 (1):41-50.
- 653 Viana, J.M.S., F.F. Silva, G.B. Mundim, C.F. Azevedo, and H.U. Jan, 2017b Efficiency of low  
654 heritability QTL mapping under high SNP density. *Euphytica* 213 (1).
- 655 Viana, J.M.S., M.S.F. Valente, F.F. Silva, G.B. Mundim, and G.P. Paes, 2013 Efficacy of  
656 population structure analysis with breeding populations and inbred lines. *Genetica* 141 (7-  
657 9):389-399.
- 658 Windhausen, V.S., G.N. Atlin, J.M. Hickey, J. Crossa, J.-L. Jannink *et al.*, 2012 Effectiveness of  
659 Genomic Prediction of Maize Hybrid Performance in Different Breeding Populations and  
660 Environments. *G3-Genes Genomes Genetics* 2 (11):1427-1436.
- 661 Xu, S., D. Zhu, and Q. Zhang, 2014 Predicting hybrid performance in rice using genomic best linear  
662 unbiased prediction. *Proceedings of the National Academy of Sciences of the United States of*  
663 *America* 111 (34):12456-12461.
- 664 Zhao, Y., M. Gowda, W. Liu, T. Wuerschum, H.P. Maurer *et al.*, 2013a Choice of shrinkage  
665 parameter and prediction of genomic breeding values in elite maize breeding populations. *Plant*  
666 *Breeding* 132 (1):99-106.
- 667 Zhao, Y., M.F. Mette, and J.C. Reif, 2015 Genomic selection in hybrid breeding. *Plant Breeding*  
668 134 (1):1-10.
- 669 Zhao, Y., J. Zeng, R. Fernando, and J.C. Reif, 2013b Genomic Prediction of Hybrid Wheat  
670 Performance. *Crop Science* 53 (3):802.
- 671

672 **Table 1** Average prediction accuracies of non-assessed single crosses and its standard deviation,  
 673 assuming single crosses from selected DH lines, 30 and 10% of assessed single crosses, two traits  
 674 (grain yield - GY, g/plant, and expansion volume - EV, mL/g), two sampling processes of single  
 675 crosses, four statistical models, three DH lines sampling processes, two genetic models, and three  
 676 accuracies of assessed single crosses

| Trait              | Samp. proc. | Statistical model  | DH lines                     | Gen. mod.          | Accuracy of assessed single crosses |                 |                 |                 |
|--------------------|-------------|--------------------|------------------------------|--------------------|-------------------------------------|-----------------|-----------------|-----------------|
|                    |             |                    |                              |                    | 0.55                                | 0.77            | 1.00            |                 |
| GY                 | SCs         | Viana et al.       | 1/S <sub>0</sub>             | AD                 | 0.7790 ± 0.0124                     | 0.8447 ± 0.0066 | 0.8859 ± 0.0018 |                 |
|                    |             |                    |                              | A                  | 0.7688 ± 0.0132                     | 0.8380 ± 0.0067 | 0.8821 ± 0.0019 |                 |
|                    |             |                    | 1-5/S <sub>0</sub>           | AD                 | 0.7947 ± 0.0125                     | 0.8525 ± 0.0072 | 0.8896 ± 0.0025 |                 |
|                    |             |                    |                              | A                  | 0.7895 ± 0.0126                     | 0.8465 ± 0.0077 | 0.8858 ± 0.0027 |                 |
|                    |             |                    | 1-5/S <sub>3</sub>           | AD                 | 0.8010 ± 0.0145                     | 0.8678 ± 0.0054 | 0.9276 ± 0.0025 |                 |
|                    |             |                    |                              | A                  | 0.7954 ± 0.0145                     | 0.8627 ± 0.0056 | 0.9238 ± 0.0026 |                 |
|                    |             |                    | 1-5/S <sub>3</sub>           | AD <sup>a</sup>    | 0.7718 ± 0.0161                     | 0.8371 ± 0.0079 | 0.8888 ± 0.0043 |                 |
|                    |             |                    | 1-5/S <sub>3</sub>           | AD <sup>b</sup>    | 0.6836 ± 0.0277                     | 0.7885 ± 0.0139 | 0.8817 ± 0.0049 |                 |
|                    |             |                    | 1/S <sub>0</sub>             | AD <sup>c</sup>    | 0.8293 ± 0.0131                     | 0.8944 ± 0.0049 | 0.9479 ± 0.0017 |                 |
|                    |             |                    | 1-5/S <sub>3</sub>           | AD <sup>d</sup>    | 0.8267 ± 0.0082                     | 0.8928 ± 0.0043 | 0.9083 ± 0.0023 |                 |
|                    |             |                    | Massman et. al. <sup>e</sup> | 1/S <sub>0</sub>   | AD                                  | 0.7874 ± 0.0118 | 0.8519 ± 0.0053 | 0.8924 ± 0.0026 |
|                    |             |                    |                              | 1-5/S <sub>0</sub> | AD                                  | 0.7982 ± 0.0140 | 0.8622 ± 0.0055 | 0.8973 ± 0.0025 |
|                    |             |                    |                              | 1-5/S <sub>3</sub> | AD                                  | 0.8074 ± 0.0112 | 0.8753 ± 0.0056 | 0.9314 ± 0.0026 |
|                    |             |                    |                              | GBLUP              | 1/S <sub>0</sub>                    | AD              | 0.7841 ± 0.0122 | 0.8477 ± 0.0064 |
|                    |             |                    | GBLUP                        | 1-5/S <sub>0</sub> | AD                                  | 0.7973 ± 0.0124 | 0.8574 ± 0.0070 | 0.8978 ± 0.0019 |
|                    |             |                    |                              | 1-5/S <sub>3</sub> | AD                                  | 0.7911 ± 0.0146 | 0.8639 ± 0.0056 | 0.9319 ± 0.0023 |
|                    | BLUP        | 1/S <sub>0</sub>   |                              | AD                 | 0.7855 ± 0.0129                     | 0.8541 ± 0.0059 | 0.8899 ± 0.0019 |                 |
|                    | BLUP        | 1-5/S <sub>0</sub> | AD                           | 0.7803 ± 0.0143    | 0.8435 ± 0.0074                     | 0.8830 ± 0.0024 |                 |                 |
|                    |             | 1-5/S <sub>3</sub> | AD                           | 0.7227 ± 0.0203    | 0.7915 ± 0.0077                     | 0.8373 ± 0.0048 |                 |                 |
|                    |             | DHs                | Viana et al.                 | 1/S <sub>0</sub>   | AD                                  | 0.5012 ± 0.0416 | 0.5117 ± 0.0467 | 0.5343 ± 0.0467 |
| 1-5/S <sub>0</sub> | AD          |                    |                              | 0.4827 ± 0.0423    | 0.5000 ± 0.0420                     | 0.5036 ± 0.0465 |                 |                 |
| 1-5/S <sub>3</sub> | AD          |                    |                              | 0.5799 ± 0.0437    | 0.6106 ± 0.0413                     | 0.6357 ± 0.0429 |                 |                 |
| EV                 | SCs         | Viana et al.       | 1/S <sub>0</sub>             | AD                 | 0.7779 ± 0.0157                     | 0.8458 ± 0.0069 | 0.8820 ± 0.0024 |                 |
|                    |             |                    | 1-5/S <sub>0</sub>           | AD                 | 0.8019 ± 0.0155                     | 0.8656 ± 0.0050 | 0.9055 ± 0.0020 |                 |
|                    |             |                    | 1-5/S <sub>3</sub>           | AD                 | 0.7589 ± 0.0143                     | 0.8424 ± 0.0058 | 0.9165 ± 0.0027 |                 |

<sup>a</sup>density of 1 cM; <sup>b</sup>training set of 490 single crosses (10%); <sup>c</sup>after 10 generations of random crosses; <sup>d</sup>single crosses from DH lines of the same population; <sup>e</sup>and Technow et al..

677 **Table 2** Average coincidence of the best 300 predicted single crosses and its standard deviation,  
 678 assuming single crosses from selected DH lines, 30 and 10% of assessed single crosses, two traits  
 679 (grain yield - GY, g/plant, and expansion volume - EV, mL/g), two sampling processes of single  
 680 crosses, four statistical models, three DH lines sampling processes, two genetic models, and three  
 681 parametric coincidence of assessed single crosses

| Trait              | Samp. proc. | Statistical model            | DH lines           | Gen. mod.        | Coincidence of assessed single crosses |                 |                 |
|--------------------|-------------|------------------------------|--------------------|------------------|----------------------------------------|-----------------|-----------------|
|                    |             |                              |                    |                  | 0.26                                   | 0.48            | 1.00            |
| GY                 | SCs         | Viana et al.                 | 1/S <sub>0</sub>   | AD               | 0.4523 ± 0.0334                        | 0.5525 ± 0.0190 | 0.6037 ± 0.0170 |
|                    |             |                              |                    | A                | 0.4396 ± 0.0346                        | 0.5449 ± 0.0176 | 0.5976 ± 0.0172 |
|                    |             |                              | 1-5/S <sub>0</sub> | AD               | 0.5686 ± 0.0273                        | 0.6369 ± 0.0221 | 0.6842 ± 0.0140 |
|                    |             |                              |                    | A                | 0.5640 ± 0.0283                        | 0.6299 ± 0.0221 | 0.6816 ± 0.0152 |
|                    |             |                              | 1-5/S <sub>3</sub> | AD               | 0.5129 ± 0.0235                        | 0.6044 ± 0.0200 | 0.7363 ± 0.0183 |
|                    |             |                              |                    | A                | 0.5063 ± 0.0225                        | 0.5993 ± 0.0193 | 0.7305 ± 0.0190 |
|                    |             |                              | 1-5/S <sub>3</sub> | AD <sup>a</sup>  | 0.4881 ± 0.0278                        | 0.5691 ± 0.0229 | 0.6620 ± 0.0215 |
|                    |             |                              | 1-5/S <sub>3</sub> | AD <sup>b</sup>  | 0.3805 ± 0.0511                        | 0.4797 ± 0.0354 | 0.6087 ± 0.0233 |
|                    |             |                              | 1/S <sub>0</sub>   | AD <sup>c</sup>  | 0.5528 ± 0.0298                        | 0.6489 ± 0.0203 | 0.7571 ± 0.0162 |
|                    |             |                              | 1-5/S <sub>3</sub> | AD <sup>d</sup>  | 0.6116 ± 0.0214                        | 0.7156 ± 0.0150 | 0.7581 ± 0.0166 |
|                    |             | Massman et. al. <sup>e</sup> | 1/S <sub>0</sub>   | AD               | 0.4670 ± 0.0346                        | 0.5663 ± 0.0174 | 0.6157 ± 0.0157 |
|                    |             |                              | 1-5/S <sub>0</sub> | AD               | 0.5651 ± 0.0310                        | 0.6431 ± 0.0164 | 0.6955 ± 0.0144 |
|                    |             |                              | 1-5/S <sub>3</sub> | AD               | 0.5279 ± 0.0291                        | 0.6139 ± 0.0204 | 0.7423 ± 0.0172 |
|                    |             | GBLUP                        | 1/S <sub>0</sub>   | AD               | 0.4622 ± 0.0308                        | 0.5660 ± 0.0190 | 0.6092 ± 0.0163 |
|                    |             |                              | 1-5/S <sub>0</sub> | AD               | 0.5650 ± 0.0280                        | 0.6384 ± 0.0204 | 0.6849 ± 0.0137 |
|                    |             |                              | 1-5/S <sub>3</sub> | AD               | 0.5010 ± 0.0245                        | 0.5937 ± 0.0216 | 0.7294 ± 0.0168 |
|                    |             | BLUP                         | 1/S <sub>0</sub>   | AD               | 0.4641 ± 0.0331                        | 0.5709 ± 0.0176 | 0.6081 ± 0.0127 |
|                    |             |                              | 1-5/S <sub>0</sub> | AD               | 0.5531 ± 0.0323                        | 0.6272 ± 0.0194 | 0.6699 ± 0.0130 |
|                    |             |                              | 1-5/S <sub>3</sub> | AD               | 0.4172 ± 0.0258                        | 0.4731 ± 0.0211 | 0.5377 ± 0.0196 |
|                    |             | DHs                          | Viana et al.       | 1/S <sub>0</sub> | AD                                     | 0.2753 ± 0.0374 | 0.3056 ± 0.0445 |
| 1-5/S <sub>0</sub> | AD          |                              |                    | 0.3268 ± 0.0642  | 0.3400 ± 0.0691                        | 0.3461 ± 0.0728 |                 |
| 1-5/S <sub>3</sub> | AD          |                              |                    | 0.3699 ± 0.0583  | 0.3931 ± 0.0579                        | 0.4300 ± 0.0633 |                 |
| EV                 | SCs         | Viana et al.                 | 1/S <sub>0</sub>   | AD               | 0.5156 ± 0.0331                        | 0.6081 ± 0.0159 | 0.6599 ± 0.0146 |
|                    |             |                              | 1-5/S <sub>0</sub> | AD               | 0.5506 ± 0.0285                        | 0.6337 ± 0.0203 | 0.6944 ± 0.0141 |
|                    |             |                              | 1-5/S <sub>3</sub> | AD               | 0.4746 ± 0.0294                        | 0.5843 ± 0.0174 | 0.7141 ± 0.0171 |

<sup>a</sup>density of 1 cM; <sup>b</sup>training set of 490 single crosses (10%); <sup>c</sup>after 10 generations of random crosses; <sup>d</sup>single crosses from DH lines of the same population; <sup>e</sup>and Technow et al..



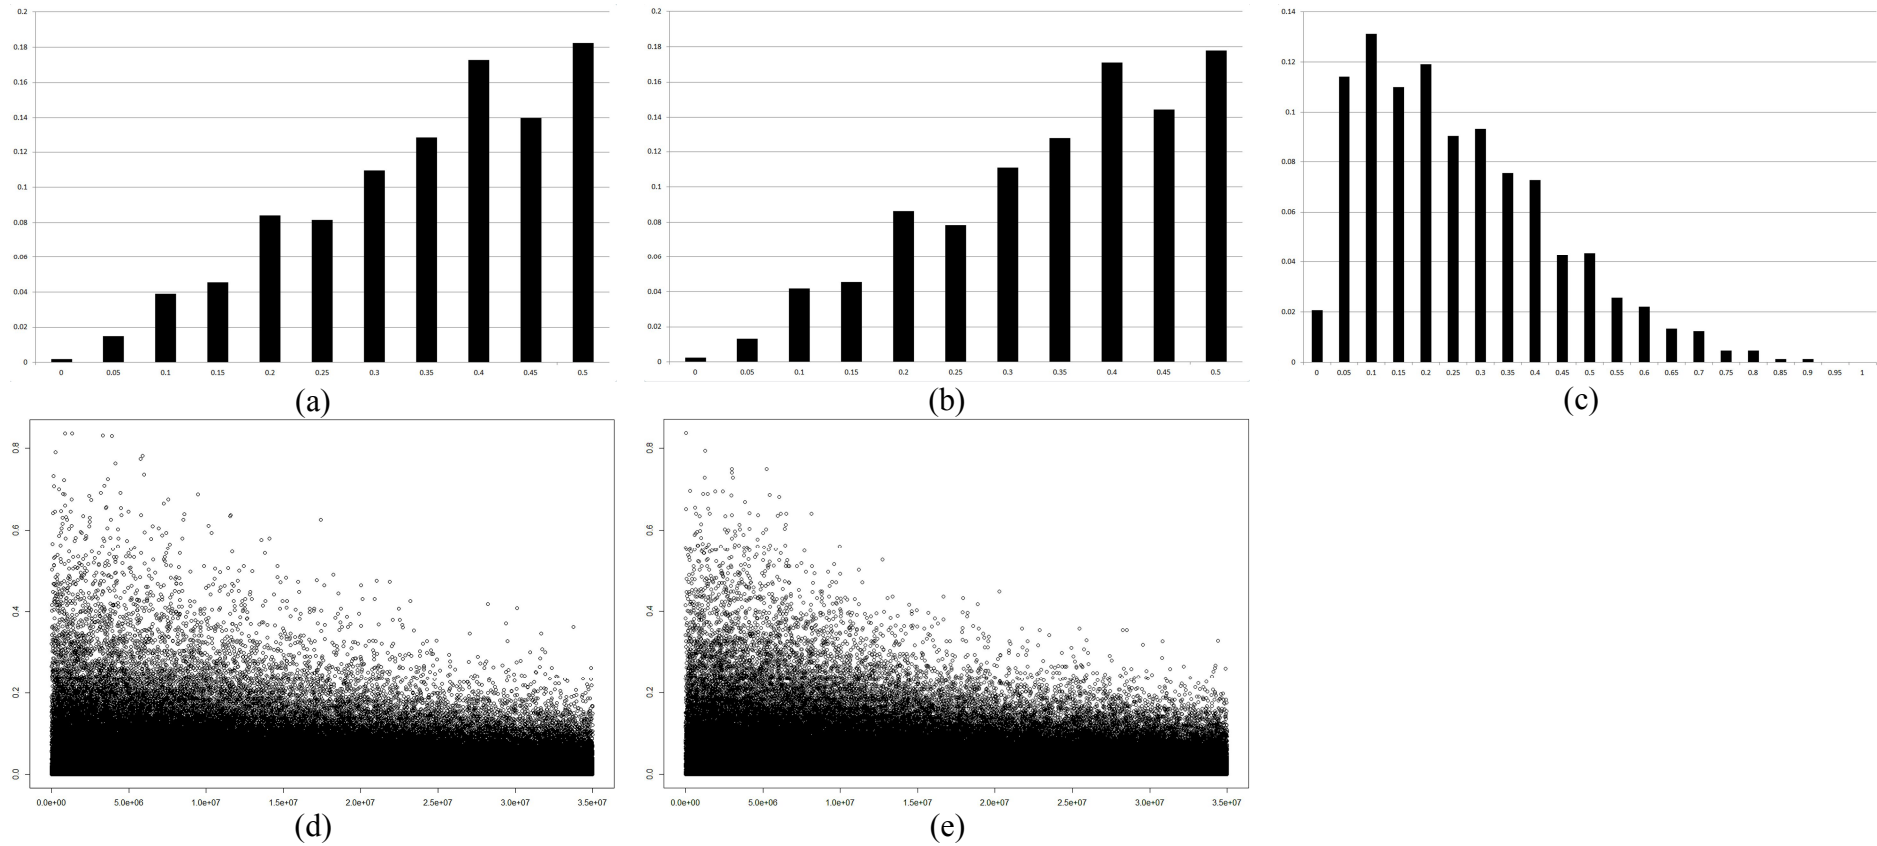

682 **Figure 1** Frequency distribution of the MAF in the groups of selected DH lines (a and b) and the absolute value of the difference between a SNP allele  
 683 frequency (c), and LD ( $r^2$ ) in relation to distance (cM) in the two groups of selected DH lines (d and e), regarding SNPs in chromosome 1 separated by  
 684 zero to 35 cM, assuming one DH line per  $S_0$  plant.

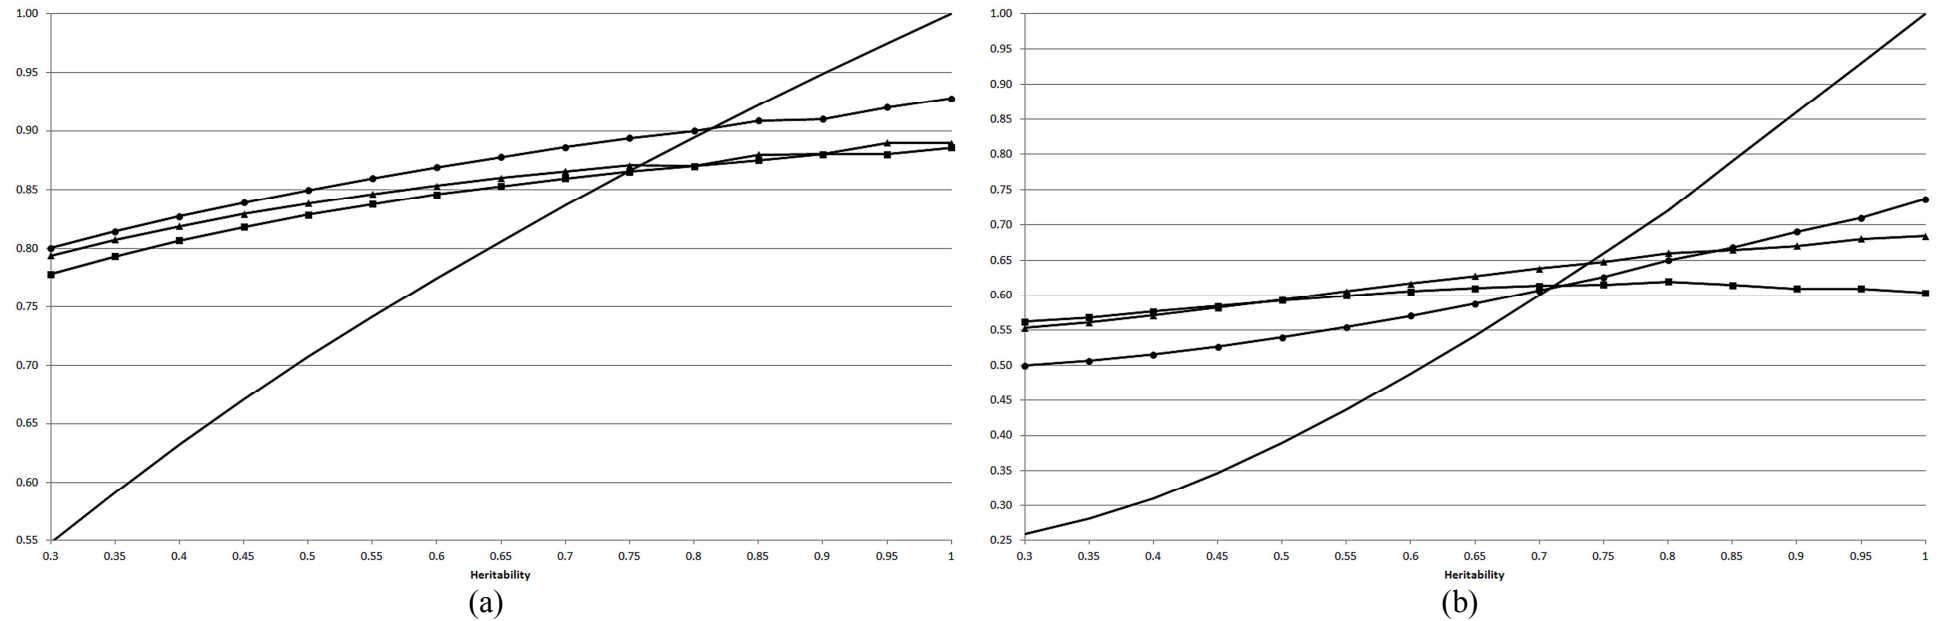

685 **Figure 2** Predicted accuracies (a) and coincidence indexes (b) for untested single crosses (square:  $1/S_0$ ; triangle:  $1-5/S_0$ ; circle:  $1-5/S_3$ ), and parametric  
 686 accuracies and coincidence indexes for tested single crosses (continuous line), assuming our model, average SNP density of 0.1 cM, training set size of  
 687 30%, positive dominance (grain yield), additive-dominance model, and sampling of single crosses.
